# Supplementary material for: Assessment of humaneness using gunshot targeting the brain and cervical spine for cervid depopulation under field conditions
Source: PubMed Central journal article supplement (PMC6395039; doi:10.1371/journal.pone.0213200), 2019-02-28
Supplement: pone.0213200.s001.pdf [file pone.0213200.s001.pdf]

| <b>Date</b> | <b>Shooter</b> | <b>Sex</b> | <b>Shot Placement</b> | <b>Cessation of Heartbeat (s)</b> | <b>Cessation of Respiration (s)1</b> |
|-------------|----------------|------------|-----------------------|-----------------------------------|--------------------------------------|
| 4/1/2015    | AD             | FAWN       | cranial               | No data                           | 0                                    |
| 4/1/2015    | AD             | AM         | cranial               | No data                           | 0                                    |
| 4/1/2015    | AD             | AF         | cranial               | No data                           | 0                                    |
| 4/1/2015    | AD             | FAWN       | cranial               | No data                           | 0                                    |
| 4/1/2015    | AD             | AF         | cranial               | No data                           | 0                                    |
| 4/1/2015    | AD             | AF         | cranial               | No data                           | 0                                    |
| 4/1/2015    | AD             | AF         | cranial               | No data                           | 0                                    |
| 4/1/2015    | AD             | FAWN       | cranial               | No data                           | 0                                    |
| 4/1/2015    | AD             | AM         | cranial               | No data                           | 0                                    |
| 4/1/2015    | AD             | AF         | cranial               | No data                           | 0                                    |
| 4/1/2015    | AD             | AF         | cranial               | No data                           | 0                                    |
| 4/1/2015    | AD             | FAWN       | cranial               | No data                           | 0                                    |
| 4/1/2015    | AD             | FAWN       | cranial               | No data                           | 0                                    |
| 4/1/2015    | AD             | AF         | cranial               | No data                           | 0                                    |
| 4/1/2015    | AD             | AF         | cranial               | No data                           | 0                                    |
| 4/1/2015    | AD             | AF         | cranial               | No data                           | 0                                    |
| 4/1/2015    | AD             | AF         | cranial               | No data                           | 0                                    |
| 4/1/2015    | AD             | FAWN       | cranial               | No data                           | 0                                    |
| 4/2/2015    | DW             | AF         | cranial               | No data                           | 0                                    |
| 4/2/2015    | DW             | AF         | cranial               | No data                           | 0                                    |
| 4/2/2015    | DW             | FAWN       | cranial               | No data                           | 0                                    |
| 4/2/2015    | DW             | AF         | cranial               | No data                           | 0                                    |
| 4/2/2015    | DW             | AF         | cranial               | No data                           | 0                                    |
| 4/2/2015    | DW             | AM         | cranial               | No data                           | 0                                    |
| 4/2/2015    | DW             | AM         | cranial               | No data                           | 0                                    |
| 4/2/2015    | DW             | FAWN       | cranial               | No data                           | 0                                    |
| 4/2/2015    | DW             | AF         | cranial               | No data                           | 0                                    |
| 4/2/2015    | DW             | AF         | cranial               | No data                           | 0                                    |
| 4/2/2015    | DW             | FAWN       | cranial               | No data                           | 0                                    |
| 4/2/2015    | DW             | AF         | cranial               | No data                           | 0                                    |
| 4/2/2015    | DW             | FAWN       | cranial               | No data                           | 0                                    |
| 4/2/2015    | DW             | AF         | cranial               | No data                           | 0                                    |
| 4/2/2015    | DW             | AF         | cranial               | No data                           | 0                                    |
| 4/2/2015    | DW             | AF         | cranial               | No data                           | 0                                    |
| 4/2/2015    | DW             | AM         | cranial               | No data                           | 0                                    |
| 4/2/2015    | DW             | FAWN       | cranial               | No data                           | 0                                    |
| 4/2/2015    | AD             | AM         | cranial               | No data                           | 0                                    |
| 4/2/2015    | DW             | AM         | cranial               | No data                           | 0                                    |
| 4/2/2015    | DW             | AF         | cranial               | No data                           | 0                                    |
| 4/2/2015    | DW             | FAWN       | cranial               | No data                           | 0                                    |
| 4/2/2015    | DW             | AM         | cranial               | No data                           | 0                                    |
| 4/8/2015    | DW             | AF         | cranial               | No data                           | 0                                    |
| 4/8/2015    | DW             | FAWN       | cranial               | No data                           | 0                                    |
| 4/8/2015    | DW             | AF         | cranial               | No data                           | 0                                    |

|           |    |      |         |         |   |
|-----------|----|------|---------|---------|---|
| 4/8/2015  | JH | AF   | cranial | No data | 0 |
| 4/8/2015  | JH | AF   | cranial | No data | 0 |
| 4/8/2015  | JH | FAWN | cranial | No data | 0 |
| 4/8/2015  | JH | AF   | cranial | No data | 0 |
| 4/8/2015  | JH | AM   | cranial | No data | 0 |
| 4/8/2015  | JH | AM   | cranial | No data | 0 |
| 4/8/2015  | JH | FAWN | cranial | No data | 0 |
| 4/8/2015  | JH | AF   | cranial | No data | 0 |
| 4/8/2015  | JH | FAWN | cranial | No data | 0 |
| 4/8/2015  | JH | AM   | cranial | No data | 0 |
| 4/8/2015  | AD | AF   | cranial | 300     | 0 |
| 4/8/2015  | AD | AF   | cranial | 250     | 0 |
| 4/8/2015  | JH | AF   | cranial | No data | 0 |
| 4/8/2015  | JH | AM   | cranial | No data | 0 |
| 4/8/2015  | JH | AF   | cranial | No data | 0 |
| 4/8/2015  | JH | FAWN | cranial | No data | 0 |
| 4/8/2015  | JH | AF   | cranial | No data | 0 |
| 4/8/2015  | JH | AM   | cranial | No data | 0 |
| 4/8/2015  | JH | AM   | cranial | No data | 0 |
| 4/8/2015  | JH | AF   | cranial | No data | 0 |
| 4/8/2015  | JH | FAWN | cranial | No data | 0 |
| 4/8/2015  | JH | AF   | cranial | No data | 0 |
| 4/8/2015  | JH | AF   | cranial | No data | 0 |
| 4/14/2015 | RR | FAWN | cranial | No data | 0 |
| 4/14/2015 | RR | AM   | cranial | No data | 0 |
| 4/14/2015 | RR | FAWN | cranial | No data | 0 |
| 4/14/2015 | RR | AF   | cranial | No data | 0 |
| 4/14/2015 | RR | AF   | cranial | No data | 0 |
| 4/14/2015 | RR | AF   | cranial | No data | 0 |
| 4/14/2015 | RR | AF   | cranial | No data | 0 |
| 4/14/2015 | RR | FAWN | cranial | No data | 0 |
| 4/14/2015 | RR | FAWN | cranial | No data | 0 |
| 4/14/2015 | RR | AF   | cranial | No data | 0 |
| 4/14/2015 | RR | AM   | cranial | No data | 0 |
| 4/14/2015 | RR | AF   | cranial | No data | 0 |
| 4/14/2015 | RR | AM   | cranial | No data | 0 |
| 4/14/2015 | RR | FAWN | cranial | No data | 0 |
| 4/14/2015 | RR | AF   | cranial | No data | 0 |
| 4/14/2015 | RR | FAWN | cranial | No data | 0 |
| 4/14/2015 | RR | AM   | cranial | No data | 0 |
| 4/14/2015 | RR | AF   | cranial | No data | 0 |
| 4/14/2015 | RR | AF   | cranial | No data | 0 |
| 4/14/2015 | RR | AM   | cranial | No data | 0 |
| 4/14/2015 | RR | FAWN | cranial | No data | 0 |
| 4/14/2015 | RR | AF   | cranial | No data | 0 |
| 4/14/2015 | RR | AF   | cranial | No data | 0 |
| 4/14/2015 | RR | AF   | cranial | No data | 0 |
| 4/15/2015 | AD | AF   | cranial | No data | 0 |
| 4/15/2015 | AD | AM   | cranial | No data | 0 |
| 4/15/2015 | AD | AF   | cranial | No data | 0 |
| 4/15/2015 | AD | AM   | cranial | No data | 0 |
| 4/15/2015 | AD | FAWN | cranial | No data | 0 |

|           |    |      |         |         |   |
|-----------|----|------|---------|---------|---|
| 4/15/2015 | AD | AF   | cranial | No data | 0 |
| 4/15/2015 | AD | AF   | cranial | No data | 0 |
| 4/15/2015 | AD | AM   | cranial | No data | 0 |
| 4/15/2015 | AD | AF   | cranial | No data | 0 |
| 4/15/2015 | AD | AF   | cranial | No data | 0 |
| 4/15/2015 | AD | AF   | cranial | No data | 0 |
| 4/15/2015 | AD | AF   | cranial | No data | 0 |
| 4/15/2015 | AD | AF   | cranial | No data | 0 |
| 4/15/2015 | AD | FAWN | cranial | No data | 0 |
| 4/15/2015 | AD | AF   | cranial | No data | 0 |
| 4/16/2015 | AD | AF   | cranial | No data | 0 |
| 4/16/2015 | AD | AM   | cranial | No data | 0 |
| 4/16/2015 | AD | AM   | cranial | No data | 0 |
| 4/16/2015 | AD | AM   | cranial | No data | 0 |
| 4/16/2015 | DW | FAWN | cranial | No data | 0 |
| 4/16/2015 | DW | FAWN | cranial | No data | 0 |
| 4/16/2015 | DW | FAWN | cranial | No data | 0 |
| 4/16/2015 | DW | AF   | cranial | No data | 0 |
| 4/16/2015 | DW | FAWN | cranial | No data | 0 |
| 4/16/2015 | DW | AM   | cranial | No data | 0 |
| 4/16/2015 | DW | AF   | cranial | No data | 0 |
| 4/16/2015 | DW | FAWN | cranial | No data | 0 |
| 4/16/2015 | DW | AF   | cranial | No data | 0 |
| 4/16/2015 | DW | AF   | cranial | No data | 0 |
| 4/16/2015 | DW | AF   | cranial | No data | 0 |
| 4/16/2015 | DW | AF   | cranial | No data | 0 |
| 4/16/2015 | DW | AF   | cranial | No data | 0 |
| 4/16/2015 | DW | AF   | cranial | No data | 0 |
| 4/16/2015 | DW | AF   | cranial | No data | 0 |
| 4/16/2015 | DW | FAWN | cranial | No data | 0 |
| 4/16/2015 | DW | FAWN | cranial | No data | 0 |
| 4/16/2015 | DW | FAWN | cranial | No data | 0 |
| 4/16/2015 | DW | FAWN | cranial | No data | 0 |
| 4/16/2015 | DW | AF   | cranial | No data | 0 |
| 4/16/2015 | DW | FAWN | cranial | No data | 0 |

- 1 - upon arrival to carcass
- 2 - upon arrive to carcass
- 3 - measured to the nearest 0.5 cm

| Cessation of Eye Reflex (s)2 | Cessation of Body Spasms (s) | Cessation of Leg Spasms (s) | Time to recumbancy (s) | Image # | POI to POA (cm)3 | Distance to Animal (m) |
|------------------------------|------------------------------|-----------------------------|------------------------|---------|------------------|------------------------|
| 0                            | No data                      | No data                     | 0                      | None    | 0.3              | 14                     |
| 0                            | No data                      | No data                     | 0                      | None    | 1                | 40                     |
| 0                            | No data                      | No data                     | 0                      | None    | 0.9              | 33                     |
| 0                            | No data                      | No data                     | 0                      | None    | 0.2              | 79                     |
| 0                            | No data                      | No data                     | 0                      | None    | 0                | 23                     |
| 0                            | No data                      | No data                     | 0                      | None    | 1.1              | 47                     |
| 0                            | No data                      | No data                     | 0                      | None    | 1.3              | 43                     |
| 0                            | No data                      | No data                     | 0                      | None    | 0.6              | 92                     |
| 0                            | No data                      | No data                     | 0                      | None    | 0.5              | 55                     |
| 0                            | No data                      | No data                     | 0                      | None    | 1.4              | 107                    |
| 0                            | No data                      | No data                     | 0                      | None    | 0.3              | 12                     |
| 0                            | No data                      | No data                     | 0                      | None    | 1.2              | 67                     |
| 0                            | No data                      | No data                     | 0                      | None    | 0                | 36                     |
| 0                            | No data                      | No data                     | 0                      | None    | 0.6              | 87                     |
| 0                            | No data                      | No data                     | 0                      | None    | 1.7              | 21                     |
| 0                            | No data                      | No data                     | 0                      | None    | 0.4              | 25                     |
| 0                            | No data                      | No data                     | 0                      | None    | 1.3              | 61                     |
| 0                            | No data                      | No data                     | 0                      | None    | 1.8              | 97                     |
| 0                            | No data                      | No data                     | 0                      | None    | 1.3              | 112                    |
| 0                            | No data                      | No data                     | 0                      | None    | 1.2              | 32                     |
| 0                            | No data                      | No data                     | 0                      | None    | 0.7              | 35                     |
| 0                            | No data                      | No data                     | 0                      | None    | 1                | 77                     |
| 0                            | No data                      | No data                     | 0                      | None    | 1.5              | 49                     |
| 0                            | No data                      | No data                     | 0                      | None    | 0.3              | 11                     |
| 0                            | No data                      | No data                     | 0                      | None    | 1.6              | 24                     |
| 0                            | No data                      | No data                     | 0                      | None    | 1                | 89                     |
| 0                            | No data                      | No data                     | 0                      | None    | 1.2              | 93                     |
| 0                            | No data                      | No data                     | 0                      | None    | 0                | 56                     |
| 0                            | No data                      | No data                     | 0                      | None    | 0.5              | 12                     |
| 0                            | No data                      | No data                     | 0                      | None    | 1.1              | 122                    |
| 0                            | No data                      | No data                     | 0                      | None    | 1.3              | 16                     |
| 0                            | No data                      | No data                     | 0                      | None    | 1.7              | 21                     |
| 0                            | No data                      | No data                     | 0                      | None    | 0.4              | 19                     |
| 0                            | No data                      | No data                     | 0                      | None    | 0.8              | 64                     |
| 0                            | No data                      | No data                     | 0                      | None    | 1                | 99                     |
| 0                            | No data                      | No data                     | 0                      | None    | 1.2              | 111                    |
| 0                            | No data                      | No data                     | 0                      | None    | 0.2              | 32                     |
| 0                            | 0                            | 0                           | 0                      | AK22    | 0.6              | 68                     |
| 0                            | No data                      | No data                     | 0                      | None    | 0.8              | 74                     |
| 0                            | No data                      | No data                     | 0                      | None    | 0.7              | 57                     |
| 0                            | No data                      | No data                     | 0                      | None    | 1.2              | 60                     |
| 0                            | No data                      | No data                     | 0                      | None    | 0.2              | 79                     |
| 0                            | No data                      | No data                     | 0                      | None    | 0.3              | 31                     |
| 0                            | No data                      | No data                     | 0                      | None    | 0                | 91                     |
| 0                            | No data                      | No data                     | 0                      | None    | 1.4              | 44                     |

|   |         |         |   |      |     |     |
|---|---------|---------|---|------|-----|-----|
| 0 | No data | No data | 0 | None | 0.9 | 103 |
| 0 | No data | No data | 0 | None | 0.3 | 10  |
| 0 | No data | No data | 0 | None | 0.7 | 19  |
| 0 | No data | No data | 0 | None | 0   | 20  |
| 0 | No data | No data | 0 | None | 1.6 | 111 |
| 0 | No data | No data | 0 | None | 0.2 | 26  |
| 0 | No data | No data | 0 | None | 1.1 | 36  |
| 0 | No data | No data | 0 | None | 0.2 | 40  |
| 0 | No data | No data | 0 | None | 0   | 15  |
| 0 | No data | No data | 0 | None | 1.5 | 94  |
| 0 | 290     | 0       | 0 | None | 0   | 30  |
| 0 | 0       | 0       | 0 | NK4  | 0.6 | 56  |
| 0 | No data | No data | 0 | None | 1   | 106 |
| 0 | No data | No data | 0 | None | 1.2 | 73  |
| 0 | No data | No data | 0 | None | 0   | 21  |
| 0 | No data | No data | 0 | None | 0.6 | 26  |
| 0 | No data | No data | 0 | None | 1.2 | 76  |
| 0 | No data | No data | 0 | None | 1.3 | 43  |
| 0 | No data | No data | 0 | None | 0   | 38  |
| 0 | No data | No data | 0 | None | 0.5 | 49  |
| 0 | No data | No data | 0 | None | 1.7 | 63  |
| 0 | No data | No data | 0 | None | 1.6 | 96  |
| 0 | No data | No data | 0 | None | 1.2 | 39  |
| 0 | No data | No data | 0 | None | 1   | 50  |
| 0 | No data | No data | 0 | None | 1.4 | 72  |
| 0 | No data | No data | 0 | None | 0   | 66  |
| 0 | No data | No data | 0 | None | 0.7 | 104 |
| 0 | No data | No data | 0 | None | 0.3 | 29  |
| 0 | No data | No data | 0 | None | 1.8 | 88  |
| 0 | No data | No data | 0 | None | 0   | 44  |
| 0 | No data | No data | 0 | None | 1.3 | 47  |
| 0 | No data | No data | 0 | None | 0.2 | 34  |
| 0 | No data | No data | 0 | None | 0   | 80  |
| 0 | No data | No data | 0 | None | 0.4 | 47  |
| 0 | No data | No data | 0 | None | 0.7 | 61  |
| 0 | No data | No data | 0 | None | 1.7 | 118 |
| 0 | No data | No data | 0 | None | 0.3 | 16  |
| 0 | No data | No data | 0 | None | 0   | 23  |
| 0 | No data | No data | 0 | None | 1.2 | 57  |
| 0 | No data | No data | 0 | None | 0   | 51  |
| 0 | No data | No data | 0 | None | 0   | 24  |
| 0 | No data | No data | 0 | None | 0.6 | 75  |
| 0 | No data | No data | 0 | None | 0.3 | 30  |
| 0 | No data | No data | 0 | None | 1   | 23  |
| 0 | No data | No data | 0 | None | 0.2 | 64  |
| 0 | No data | No data | 0 | None | 0.7 | 29  |
| 0 | No data | No data | 0 | None | 0.4 | 81  |
| 0 | No data | No data | 0 | None | 1.1 | 107 |
| 0 | No data | No data | 0 | None | 0   | 46  |
| 0 | No data | No data | 0 | None | 0.5 | 39  |
| 0 | No data | No data | 0 | None | 0   | 53  |
| 0 | No data | No data | 0 | None | 0.3 | 11  |

|   |         |         |   |      |     |     |
|---|---------|---------|---|------|-----|-----|
| 0 | No data | No data | 0 | None | 0.8 | 88  |
| 0 | No data | No data | 0 | None | 1.4 | 89  |
| 0 | No data | No data | 0 | None | 0   | 74  |
| 0 | No data | No data | 0 | None | 0.4 | 90  |
| 0 | No data | No data | 0 | None | 0   | 33  |
| 0 | No data | No data | 0 | None | 0.6 | 54  |
| 0 | No data | No data | 0 | None | 0.3 | 16  |
| 0 | No data | No data | 0 | None | 0.9 | 19  |
| 0 | No data | No data | 0 | None | 0.2 | 13  |
| 0 | No data | No data | 0 | None | 1   | 69  |
| 0 | No data | No data | 0 | None | 0   | 45  |
| 0 | No data | No data | 0 | None | 0.4 | 21  |
| 0 | No data | No data | 0 | None | 1.8 | 90  |
| 0 | No data | No data | 0 | None | 0.3 | 14  |
| 0 | No data | No data | 0 | None | 1.5 | 32  |
| 0 | No data | No data | 0 | None | 0   | 80  |
| 0 | No data | No data | 0 | None | 1.4 | 67  |
| 0 | No data | No data | 0 | None | 0.9 | 41  |
| 0 | No data | No data | 0 | None | 0.6 | 36  |
| 0 | No data | No data | 0 | None | 1   | 83  |
| 0 | No data | No data | 0 | None | 0   | 50  |
| 0 | No data | No data | 0 | None | 0.7 | 42  |
| 0 | No data | No data | 0 | None | 1.1 | 37  |
| 0 | No data | No data | 0 | None | 1.6 | 115 |
| 0 | No data | No data | 0 | None | 0.3 | 76  |
| 0 | No data | No data | 0 | None | 0   | 49  |
| 0 | No data | No data | 0 | None | 1.6 | 93  |
| 0 | No data | No data | 0 | None | 0.8 | 85  |
| 0 | No data | No data | 0 | None | 0.7 | 66  |
| 0 | No data | No data | 0 | None | 0.3 | 61  |
| 0 | No data | No data | 0 | None | 1.4 | 14  |
| 0 | No data | No data | 0 | None | 0   | 33  |
| 0 | No data | No data | 0 | None | 0.5 | 20  |
| 0 | No data | No data | 0 | None | 1.4 | 101 |
| 0 | No data | No data | 0 | None | 1.2 | 74  |
